# Supplementary material
Source: publisher figshare collection journal article supplement (https://sage.figshare.com/ndownloader/files/24159428)
Supplement: Supplementary file 1 [file 24159428]

## Appendix

*Table A1: Percentage of claims by party family across countries*

|                         | AT  | BE  | CH  | ES  | IE  | NL  | UK  |
|-------------------------|-----|-----|-----|-----|-----|-----|-----|
| <i>Right and Centre</i> | 45% | 66% | 72% | 35% | 41% | 58% | 73% |
| <i>Left Parties</i>     | 55% | 34% | 28% | 65% | 59% | 42% | 27% |

*Table A2: Share of claims by left-wing parties divided by party family*

|     | 1995 | 96  | 97  | 98  | 99  | 2000 | 01  | 02  | 03  | 04  | 05  | 06  | 07  | 08  | 09  |
|-----|------|-----|-----|-----|-----|------|-----|-----|-----|-----|-----|-----|-----|-----|-----|
| SOC | 62%  | 87% | 68% | 50% | 73% | 56%  | 67% | 52% | 52% | 61% | 54% | 69% | 64% | 52% | 45% |
| COM | 0%   | 0%  | 2%  | 6%  | 4%  | 15%  | 5%  | 6%  | 20% | 11% | 13% | 1%  | 3%  | 10% | 5%  |
| ECO | 38%  | 13% | 30% | 44% | 23% | 30%  | 28% | 42% | 28% | 28% | 32% | 30% | 33% | 38% | 50% |

*Table A3: Regression analysis of the share of claims by left-wing parties*

|                                          | Estimate | 1-95% credibility interval | 1+95% credibility interval |
|------------------------------------------|----------|----------------------------|----------------------------|
| share of left-wing parties in parliament | -0.10    | -0.37                      | 0.14                       |
| left-wing party in government            | 0.06     | 0.03                       | 0.09                       |
| share of immigrants                      | 0.06     | -0.54                      | 0.63                       |
| GDP growth                               | 0.01     | 0.00                       | 0.01                       |
| countries, period                        | yes      |                            |                            |

*Notes: Outcome variable: share of claims by left-wing parties in a country-year (aggregated); Predictor variables: share of left-wing parties in parliament; left-wing party in government; Control variables: salience, share of immigrants, GDP growth, period, country; Hierarchical model with periods in countries; Gaussian with identity link*

*Table A4: Regression analysis of the position of claims by left-wing parties*

|                               | Estimate | 1-95% credibility interval | 1+95% credibility interval |
|-------------------------------|----------|----------------------------|----------------------------|
| Immigration control           |          |                            |                            |
| claim made by left-wing party | 0.78     | 0.69                       | 0.88                       |
| left-wing party in government | -0.08    | -0.19                      | 0.02                       |

|                               | Estimate | 1-95% credibility interval | 1+95% credibility interval |
|-------------------------------|----------|----------------------------|----------------------------|
| countries, period             | yes      |                            |                            |
| Immigrant integration         |          |                            |                            |
| claim made by left-wing party | 0.96     | 0.87                       | 1.05                       |
| left-wing party in government | 0.05     | -0.05                      | 0.14                       |
| countries, period             | yes      |                            |                            |

Notes: Outcome variable: position of claims by left-wing parties; Predictor variables: party is left-wing, left-wing party in government; Control variables: period, country; Hierarchical model with periods in countries; Gaussian with identity link

Table A5: Interpolated median position of left-wing parties over time

|                       | 1995  | 96    | 97    | 98    | 99    | 2000  | 01    | 02    | 03    | 04    | 05    | 06    | 07    | 08    | 09    |
|-----------------------|-------|-------|-------|-------|-------|-------|-------|-------|-------|-------|-------|-------|-------|-------|-------|
| Immigration control   |       |       |       |       |       |       |       |       |       |       |       |       |       |       |       |
| Left-wing             | 0.83  | 0.17  | 0.83  | 0.50  | 0.92  | 0.45  | 0.92  | 0.50  | 0.58  | 0.59  | 0.78  | 0.67  | 0.75  | 0.70  | 0.11  |
| Right-wing            | -0.50 | -0.10 | -0.25 | -0.25 | -0.75 | 0.10  | -0.67 | -0.40 | -0.75 | -0.59 | -0.28 | -0.33 | -0.38 | 0.25  | -0.36 |
| Immigrant integration |       |       |       |       |       |       |       |       |       |       |       |       |       |       |       |
| Left-wing             | 0.75  | 0.75  | 0.50  | 0.75  | 0.67  | 0.81  | 0.75  | 0.94  | 0.55  | 0.90  | 0.70  | 0.53  | 0.75  | 0.67  | 0.69  |
| Right-wing            | -0.83 | 0.25  | 0.50  | 0.25  | -0.60 | -0.17 | -0.50 | -0.36 | -0.17 | -0.55 | -0.40 | -0.63 | -0.36 | -0.56 | -0.45 |

Table A6: Interpolated median position of left-wing parties by country

|                  | AT    | BE    | CH    | ES    | IE   | NL    | UK    |
|------------------|-------|-------|-------|-------|------|-------|-------|
| Right and Centre | -0.88 | -0.42 | -0.29 | -0.11 | 0.70 | -0.29 | -0.78 |
| Left Parties     | 0.87  | 0.81  | 0.44  | 0.57  | 0.67 | 0.88  | 0.25  |

Table A7: Interpolated median position by party family

|          | ETH   | NAT   | AGR   | CON   | LIB   | CHR  | SIP  | SOC  | ECO  | COM  |
|----------|-------|-------|-------|-------|-------|------|------|------|------|------|
| Position | -0.79 | -0.72 | -0.67 | -0.41 | -0.19 | 0.05 | 0.25 | 0.52 | 0.73 | 0.90 |

*Table A8: Share of Claims by Left-Wing Parties by Presence of extreme-right parties in National Legislatures*

|                                                | <i>Share of Left-Wing, both</i> | <i>Share of Left-Wing, immigration control</i> | <i>Share of Left-Wing, immigrant integration</i> |
|------------------------------------------------|---------------------------------|------------------------------------------------|--------------------------------------------------|
| no extreme-right party in national legislature | 51%                             | 56%                                            | 60%                                              |
| extreme-right party in national legislature    | 41%                             | 35%                                            | 52%                                              |

*Table A9: Position of Claims by Left-Wing Parties by Presence of extreme-right parties in National Legislatures*

|                                                | <i>Interpolated Median of Left-Wing, both</i> | <i>Centre and Right</i> | <i>Interpolated Median of Left-Wing, immigration control</i> | <i>Centre and Right</i> | <i>Interpolated Median of Left-Wing, immigrant integration</i> | <i>Centre and Right</i> |
|------------------------------------------------|-----------------------------------------------|-------------------------|--------------------------------------------------------------|-------------------------|----------------------------------------------------------------|-------------------------|
| no extreme-right party in national legislature | 0.69                                          | -0.05                   | 0.17                                                         | -0.50                   | 0.75                                                           | 0.25                    |
| extreme-right party in national legislature    | 0.81                                          | -0.43                   | 0.40                                                         | -0.30                   | 0.62                                                           | 0.33                    |

*Table A10: Regression analysis of the share of claims by left-wing parties with ERP presence*

|                                          | <i>Estimate</i> | <i>1-95% credibility interval</i> | <i>1+95% credibility interval</i> | <i>Estimate</i> | <i>1-95% credibility interval</i> | <i>1+95% credibility interval</i> |
|------------------------------------------|-----------------|-----------------------------------|-----------------------------------|-----------------|-----------------------------------|-----------------------------------|
| share of left-wing parties in parliament | -0.10           | -0.36                             | 0.17                              | -0.13           | -0.39                             | 0.13                              |
| left-wing party in government            | 0.06            | 0.02                              | 0.09                              | 0.06            | 0.02                              | 0.09                              |
| ERP present                              | -0.01           | -0.07                             | 0.05                              |                 |                                   |                                   |
| share of ERP                             |                 |                                   |                                   | -0.16           | -0.44                             | 0.14                              |

|                     | <i>Estimate</i> | <i>1-95%</i>       | <i>1+95%</i>       | <i>Estimate</i> | <i>1-95%</i>       | <i>1+95%</i>       |
|---------------------|-----------------|--------------------|--------------------|-----------------|--------------------|--------------------|
|                     |                 | <i>credibility</i> | <i>credibility</i> |                 | <i>credibility</i> | <i>credibility</i> |
|                     |                 | <i>interval</i>    | <i>interval</i>    |                 | <i>interval</i>    | <i>interval</i>    |
| share of immigrants | 0.09            | -0.52              | 0.72               | 0.09            | -0.52              | 0.72               |
| GDP growth          | 0.01            | 0.00               | 0.01               | 0.00            | 0.00               | 0.01               |
| countries, period   | yes             |                    |                    | yes             |                    |                    |

*Notes: Outcome variable: share of claims by left-wing parties in a country-year (aggregated); Predictor variables: share of left-wing parties in parliament; left-wing party in government; presence of an extreme right-wing party (ERP) Control variables: salience, share of immigrants, GDP growth, period, country; Hierarchical model with periods in countries; Gaussian with identity link*
